# Supplementary material for: A habitat-pathology-clinical transformer model for precision prognostication of neoadjuvant immunochemotherapy in esophageal squamous cell carcinoma
Source: Research Square preprint supplement (doi:10.21203/rs.3.rs-8545817/v1), 2026-01-19
Supplement: Supplementary file 2 [file 92678a9d32965304373cbb7d.docx]

Table S1 Model performance of different machine learning algorithms of Habitat analysis (peri1mm) in the training and test cohorts

| Model | ACC | AUC | 95% CI | Sensitivity | Specificity | PPV | NPV | Cohort |
| --- | --- | --- | --- | --- | --- | --- | --- | --- |
| LR | 0.717 | 0.802 | 0.750-0.853 | 0.690 | 0.726 | 0.457 | 0.876 | Training |
| LR | 0.764 | 0.611 | 0.455-0.767 | 0.333 | 0.907 | 0.545 | 0.803 | Test |
| SVM | 0.688 | 0.692 | 0.624-0.760 | 0.714 | 0.679 | 0.426 | 0.877 | Training |
| SVM | 0.583 | 0.578 | 0.421-0.735 | 0.667 | 0.556 | 0.333 | 0.833 | Test |
| RandomForest | 0.750 | 0.738 | 0.677-0.799 | 0.500 | 0.833 | 0.500 | 0.833 | Training |
| RandomForest | 0.514 | 0.611 | 0.467-0.755 | 0.778 | 0.426 | 0.311 | 0.852 | Test |
| ExtraTrees | 0.717 | 0.843 | 0.798-0.888 | 0.798 | 0.690 | 0.462 | 0.911 | Training |
| ExtraTrees | 0.681 | 0.668 | 0.526-0.810 | 0.500 | 0.741 | 0.391 | 0.816 | Test |

Table S2 Model performance of different machine learning algorithms of Habitat analysis (peri3mm) in the training and test cohorts

| Model | ACC | AUC | 95% CI | Sensitivity | Specificity | PPV | NPV | Cohort |
| --- | --- | --- | --- | --- | --- | --- | --- | --- |
| LR | 0.780 | 0.794 | 0.739-0.848 | 0.619 | 0.833 | 0.553 | 0.868 | Training |
| LR | 0.625 | 0.553 | 0.384-0.723 | 0.556 | 0.648 | 0.345 | 0.814 | Test |
| SVM | 0.586 | 0.690 | 0.626-0.754 | 0.798 | 0.516 | 0.354 | 0.884 | Training |
| SVM | 0.542 | 0.490 | 0.321-0.658 | 0.611 | 0.519 | 0.297 | 0.800 | Test |
| RandomForest | 0.750 | 0.775 | 0.719-0.831 | 0.679 | 0.774 | 0.500 | 0.878 | Training |
| RandomForest | 0.486 | 0.639 | 0.495-0.783 | 0.944 | 0.333 | 0.321 | 0.947 | Test |
| ExtraTrees | 0.685 | 0.698 | 0.632-0.764 | 0.595 | 0.714 | 0.410 | 0.841 | Training |
| ExtraTrees | 0.458 | 0.650 | 0.510-0.791 | 0.944 | 0.296 | 0.309 | 0.941 | Test |

Table S3 Results for patch level results of backbone model for multi-instance learning–based feature aggregation

|  | ACC | AUC | 95% CI | Sensitivity | Specificity | PPV | NPV | Spec Class | Cohort |
| --- | --- | --- | --- | --- | --- | --- | --- | --- | --- |
| resnet50 | 0.863 | 0.943 | 0.9418-0.9447 | 0.853 | 0.869 | 0.776 | 0.917 | L0 | Training |
| resnet50 | 0.865 | 0.945 | 0.9434-0.9469 | 0.867 | 0.864 | 0.606 | 0.964 | L1 | Training |
| resnet50 | 0.867 | 0.945 | 0.9431-0.9464 | 0.857 | 0.870 | 0.679 | 0.950 | L2 | Training |
| resnet50 | 0.901 | 0.959 | 0.9577-0.9606 | 0.862 | 0.911 | 0.728 | 0.960 | L3 | Training |
| resnet50 | 0.635 | 0.748 | 0.7387-0.7574 | 0.771 | 0.583 | 0.413 | 0.870 | L0 | Test |
| resnet50 | 0.806 | 0.589 | 0.5733-0.6050 | 0.410 | 0.921 | 0.599 | 0.843 | L1 | Test |
| resnet50 | 0.537 | 0.705 | 0.6922-0.7170 | 0.830 | 0.495 | 0.190 | 0.953 | L2 | Test |
| resnet50 | 0.579 | 0.632 | 0.6218-0.6426 | 0.634 | 0.546 | 0.455 | 0.714 | L3 | Test |
| resnet18 | 0.826 | 0.920 | 0.9178-0.9215 | 0.844 | 0.817 | 0.712 | 0.907 | L0 | Training |
| resnet18 | 0.830 | 0.920 | 0.9175-0.9219 | 0.834 | 0.828 | 0.539 | 0.954 | L1 | Training |
| resnet18 | 0.835 | 0.916 | 0.9135-0.9177 | 0.812 | 0.842 | 0.622 | 0.933 | L2 | Training |
| resnet18 | 0.878 | 0.941 | 0.9387-0.9424 | 0.824 | 0.892 | 0.677 | 0.949 | L3 | Training |
| resnet18 | 0.457 | 0.586 | 0.5755-0.5967 | 0.922 | 0.280 | 0.327 | 0.904 | L0 | Test |
| resnet18 | 0.789 | 0.555 | 0.5393-0.5703 | 0.318 | 0.925 | 0.553 | 0.824 | L1 | Test |
| resnet18 | 0.325 | 0.570 | 0.5550-0.5840 | 0.889 | 0.244 | 0.144 | 0.939 | L2 | Test |
| resnet18 | 0.665 | 0.677 | 0.6670-0.6872 | 0.469 | 0.782 | 0.563 | 0.711 | L3 | Test |
| densenet121 | 0.855 | 0.939 | 0.9378-0.9408 | 0.862 | 0.851 | 0.756 | 0.920 | L0 | Training |
| densenet121 | 0.848 | 0.940 | 0.9387-0.9423 | 0.878 | 0.840 | 0.569 | 0.966 | L1 | Training |
| densenet121 | 0.853 | 0.938 | 0.9360-0.9396 | 0.860 | 0.850 | 0.648 | 0.950 | L2 | Training |
| densenet121 | 0.892 | 0.956 | 0.9544-0.9575 | 0.866 | 0.899 | 0.702 | 0.961 | L3 | Training |
| densenet121 | 0.503 | 0.656 | 0.6457-0.6660 | 0.919 | 0.345 | 0.348 | 0.918 | L0 | Test |
| densenet121 | 0.777 | 0.559 | 0.5436-0.5745 | 0.334 | 0.906 | 0.506 | 0.824 | L1 | Test |
| densenet121 | 0.415 | 0.674 | 0.6605-0.6868 | 0.916 | 0.343 | 0.166 | 0.966 | L2 | Test |
| densenet121 | 0.660 | 0.721 | 0.7116-0.7302 | 0.700 | 0.637 | 0.535 | 0.780 | L3 | Test |

Table S4 Model performance of different machine learning algorithms of clinical model in the training and test cohorts

| Model | ACC | AUC | 95% CI | Sensitivity | Specificity | PPV | NPV | Cohort |
| --- | --- | --- | --- | --- | --- | --- | --- | --- |
| LR | 0.798 | 0.819 | 0.766-0.871 | 0.667 | 0.841 | 0.583 | 0.883 | Training |
| LR | 0.653 | 0.668 | 0.525-0.810 | 0.778 | 0.611 | 0.400 | 0.892 | Test |
| SVM | 0.622 | 0.706 | 0.640-0.771 | 0.738 | 0.583 | 0.371 | 0.870 | Training |
| SVM | 0.792 | 0.662 | 0.489-0.834 | 0.556 | 0.870 | 0.588 | 0.855 | Test |
| RandomForest | 0.705 | 0.778 | 0.725-0.831 | 0.714 | 0.702 | 0.444 | 0.881 | Training |
| RandomForest | 0.694 | 0.730 | 0.589-0.872 | 0.778 | 0.667 | 0.437 | 0.900 | Test |
| ExtraTrees | 0.750 | 0.851 | 0.809-0.893 | 0.810 | 0.730 | 0.500 | 0.920 | Training |
| ExtraTrees | 0.653 | 0.705 | 0.561-0.850 | 0.778 | 0.611 | 0.400 | 0.892 | Test |
