# Supplementary material for: A habitat-pathology-clinical transformer model for precision prognostication of neoadjuvant immunochemotherapy in esophageal squamous cell carcinoma
Source: Research Square preprint supplement (doi:10.21203/rs.3.rs-8545817/v1), 2026-01-19
Supplement: Supplementary file 3 [file c3b9bd46451598c05a017ceb.docx]

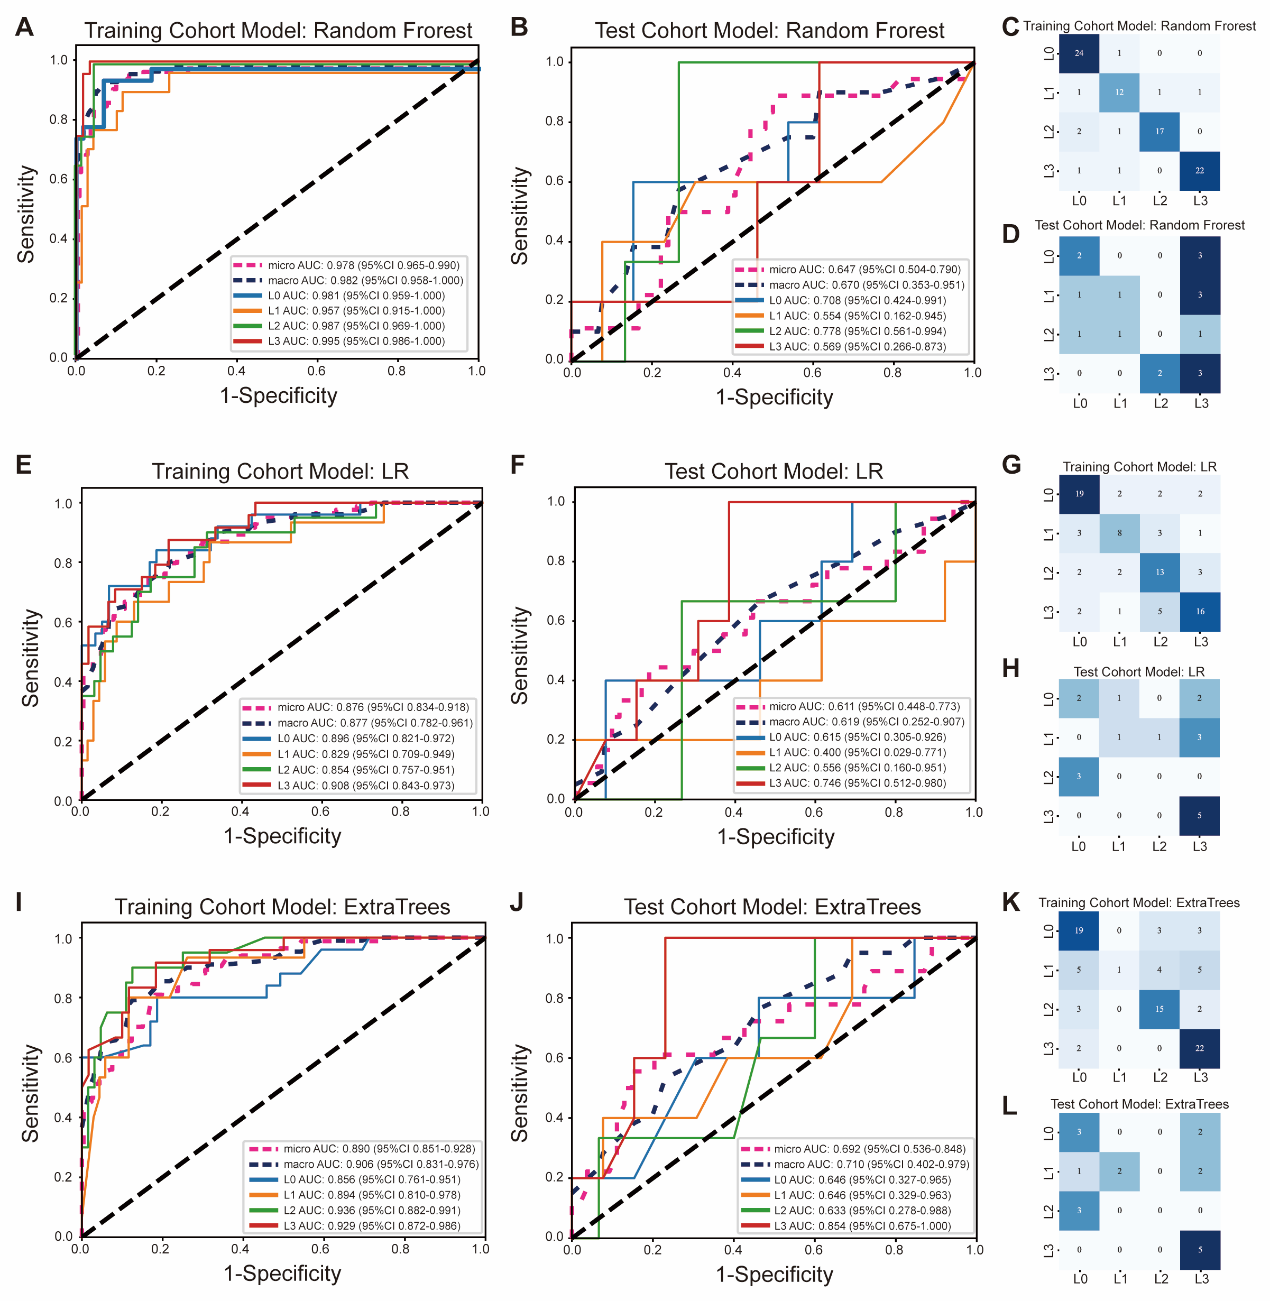


Figure S1 Performance comparison of alternative classifiers for habitat-based radiomics models

​ROC curves (A-B) and confusion matrices (C-D) for RandomForest in the training cohort and external validation cohort; ROC curves (E-F) and confusion matrices (G-H) for LR in the training cohort and external validation cohort; ROC curves (I-J) and confusion matrices (K-L) for ExtraTrees in the training cohort and external validation cohort.

ROC, Receiver operating characteristic; LR, Logistic Regression.


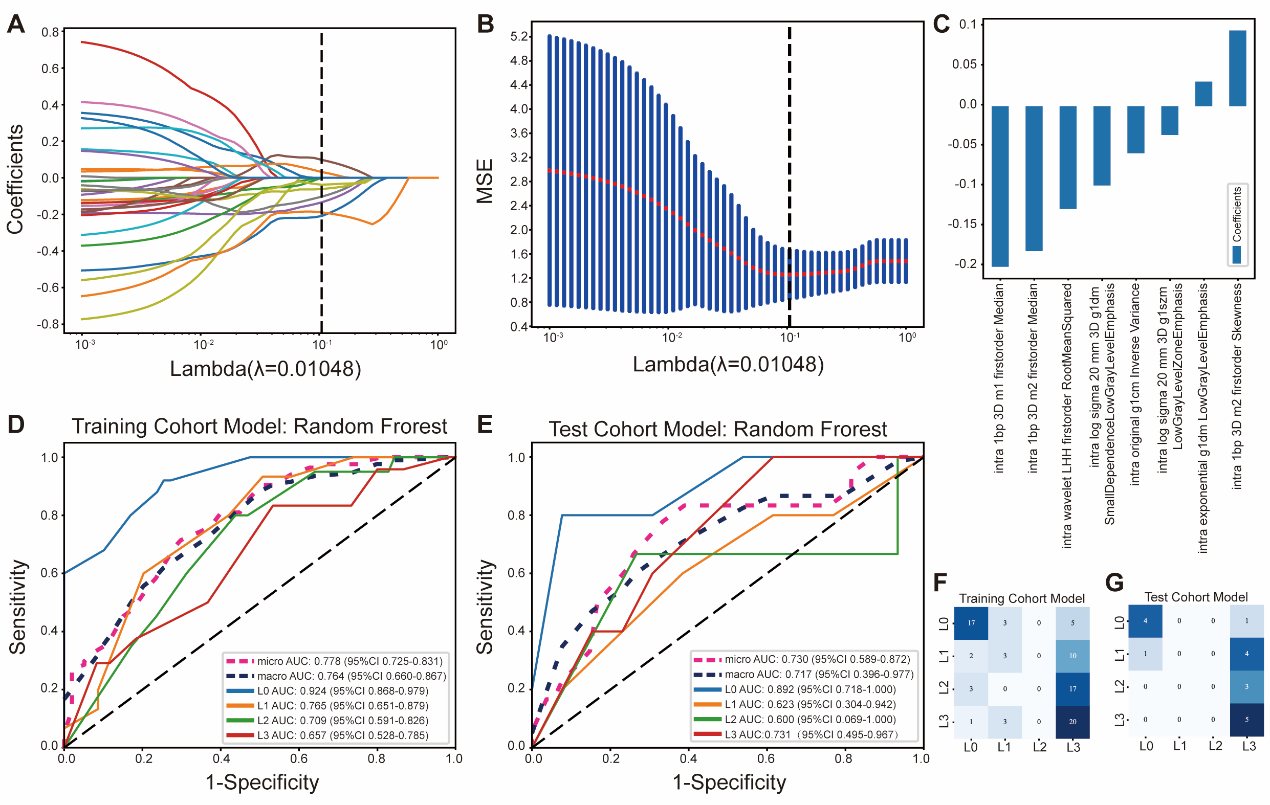


Figure S2 Feature selection and model construction of habitat-based radiomic with an expanded peritumoral margin of 1mm

(A) LASSO coefficient profiles of peritumoral expansion by 1 mm of habitat-based radiomic features; (B) Ten-fold cross-validation curve for LASSO regression; (C) Radiomic features with non-zero coefficients retained at the optimal λ; ROC curves (D-E) and confusion matrices (F-G) for Random Forest in the training cohort and external validation cohort.

LASSO, least absolute shrinkage and selection operator; ROC, Receiver operating characteristic.


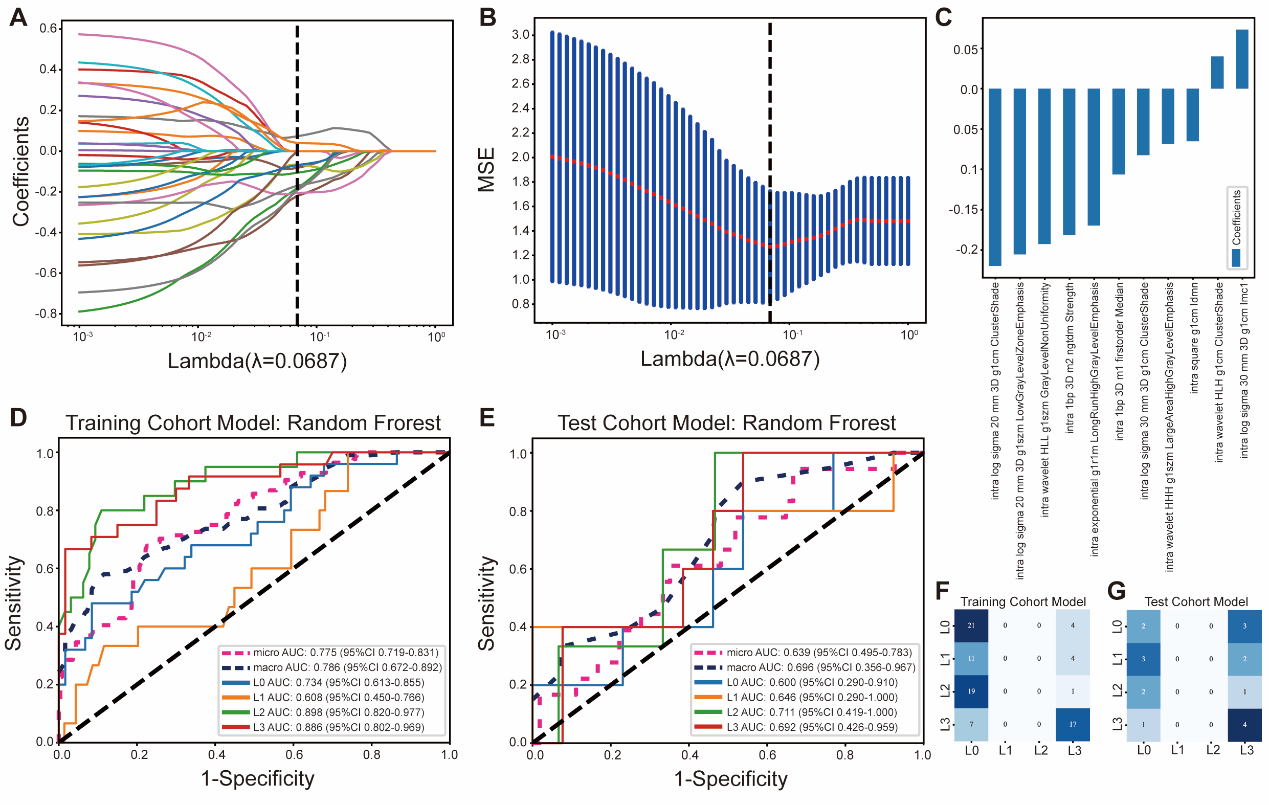


Figure S3 Feature selection and model construction of habitat-based radiomic with an expanded peritumoral margin of 3mm

(A) LASSO coefficient profiles of peritumoral expansion by 3 mm of habitat-based radiomic features; (B) Ten-fold cross-validation curve for LASSO regression; (C) Radiomic features with non-zero coefficients retained at the optimal λ; ROC curves (D-E) and confusion matrices (F-G) for Random Forest in the training cohort and external validation cohort.

LASSO, least absolute shrinkage and selection operator; ROC, Receiver operating characteristic.


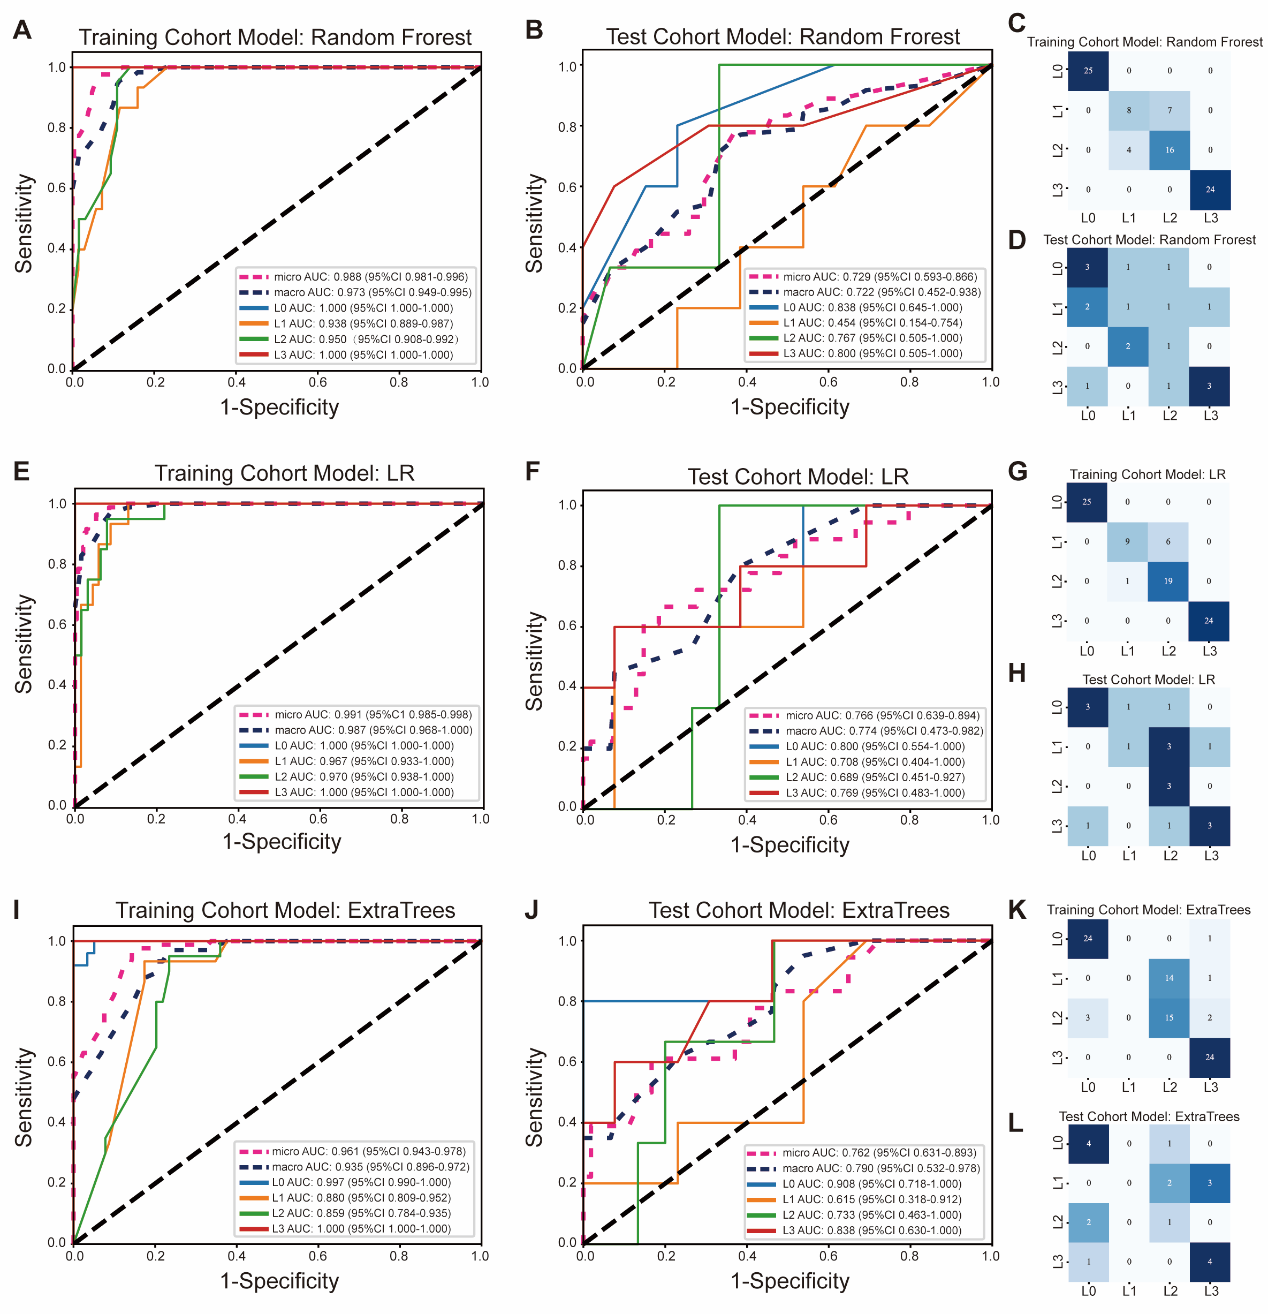


Figure S4 Performance of alternative pathomics classifiers based on multi-instance learning features

ROC curves (A-B) and confusion matrices (C-D) for Random Forest in the training cohort and external validation cohort; ROC curves (E-F) and confusion matrices (G-H) for LR in the training cohort and external validation cohort; ROC curves (I-J) and confusion matrices (K-L) for ExtraTrees in the training cohort and external validation cohort.

ROC, Receiver operating characteristic; LR, Logistic Regression.


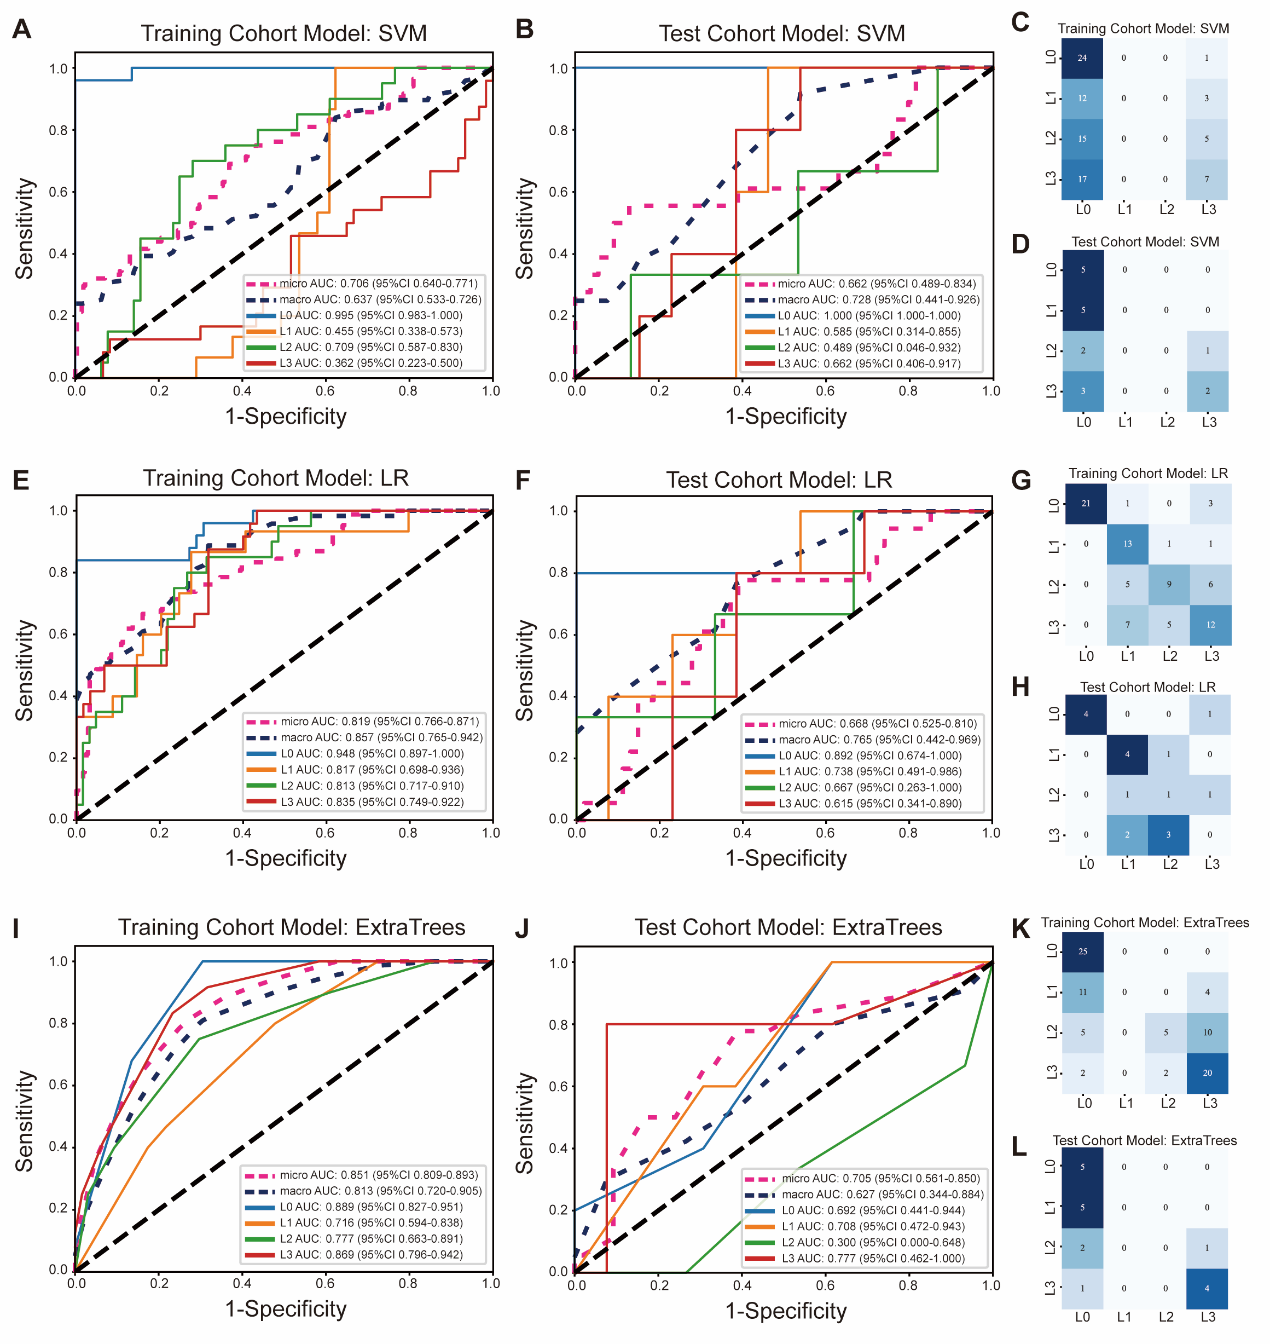


Figure S5 Performance of clinical variable-based predictive models using different machine learning algorithms

ROC curves (A-B) and confusion matrices (C-D) for SVM in the training cohort and external validation cohort; ROC curves (E-F) and confusion matrices (G-H) for LR in the training cohort and external validation cohort; ROC curves (I-J) and confusion matrices (K-L) for ExtraTrees in the training cohort and external validation cohort.

ROC, Receiver operating characteristic; LR, Logistic Regression.
